# Supplementary material
Source: PubMed Central journal article supplement (PMC3815575)
Supplement: NIHMS518698-supplement-1.pdf [file NIHMS518698-supplement-1.pdf]

Supplementary Figure S1: Full-sized immunoblots supporting cropped images shown in Figures

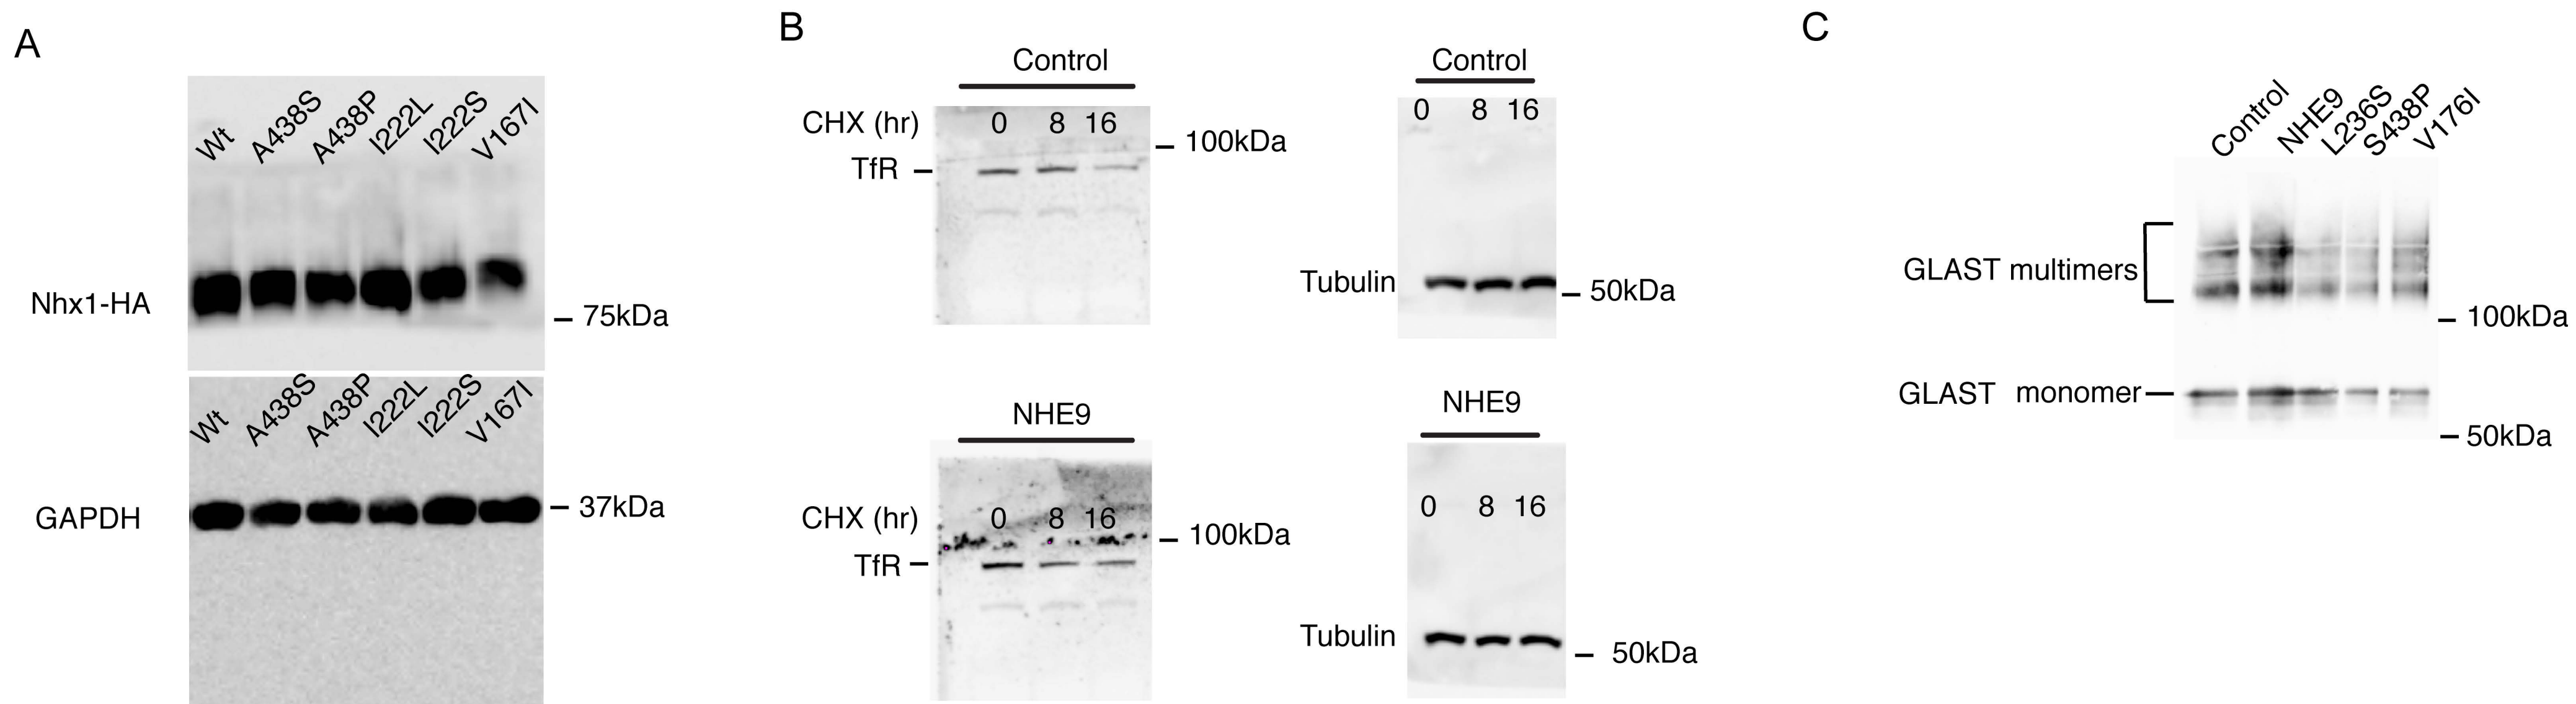

(A) Immunoblot, with anti-HA, was used to detect expression levels of HA-tagged Nhx1 and variants. GAPDH was used as loading control

(B) Immunobots, using anti-TfR antibody, showing the effects of 100 $\mu$ M cycloheximide (CHX) on TfR in control and NHE9-GFP expressing cells.

TfR bands were normalized to Tubulin levels

(C) Surface levels of GLAST, determined by biotinylation.
